Original Research Article

## **Locus coeruleus noradrenergic neurons phase-lock to prefrontal and hippocampal infra-slow rhythms that synchronize to behavioral events**

**Liyang Xiang<sup>1,2</sup>, Antoine Harel<sup>1</sup>, Ralitsa Todorova<sup>1</sup>, HongYing Gao<sup>1</sup>, Susan J. Sara<sup>1,3</sup>, Sidney I. Wiener<sup>1,\*</sup>**

<sup>1</sup>Center for Interdisciplinary Research in Biology (CIRB), College de France, CNRS, INSERM, PSL Research University, Paris, France

<sup>2</sup>Zhejiang Key Laboratory of Neuroelectronics and Brain Computer Interface Technology, Hangzhou, China

<sup>3</sup>Department of Child and Adolescent Psychiatry, New York University Medical School, New York, NY, USA

**\* Correspondence:**

Sidney Wiener  
sidney.wiener@college-de-france.fr

**Keywords:** phase reset, local field potentials, oscillations, integrative function, chronic recordings

### **Abstract**

The locus coeruleus (LC) is the primary source of noradrenergic projections to the forebrain, and, in prefrontal cortex, is implicated in decision-making and executive function. LC neurons phase-lock to cortical infra-slow wave oscillations during sleep. Such infra-slow rhythms are rarely reported in awake states, despite their interest, since they correspond to the time scale of behavior. Thus, we investigated LC neuronal synchrony with infra-slow rhythms in awake rats performing an attentional set-shifting task. Local field potential (LFP) oscillation cycles in prefrontal cortex and hippocampus on the order of 0.4 Hz phase-locked to task events at crucial maze locations. Indeed, successive cycles of the infra-slow rhythms showed different wavelengths, and if they are periodic oscillations that can reset phase relative to salient events.

Simultaneously recorded infra-slow rhythms in prefrontal cortex and hippocampus could show different cycle durations as well suggesting independent control. Most LC neurons (including optogenetically identified noradrenergic neurons) recorded here were phase-locked to these infra-slow rhythms, as were hippocampal and prefrontal units recorded on the LFP probes. The infra-slow oscillations also phase-modulated gamma amplitude, linking these rhythms at the time scale of behavior to those coordinating neuronal synchrony. This would provide a potential mechanism where noradrenaline, released by LC neurons in concert with the infra-slow rhythm, would facilitate synchronization or reset of these brain networks, underlying behavioral adaptation.

## 1 Introduction

1 The brain coordinates activity among interconnected regions via coherent oscillatory cycles of  
2 excitation and inhibition (Womelsdorf, et al., 2007). This can facilitate communication among  
3 selected subsets of neurons, groups of neurons, and brain regions. Sensory stimuli or behavioral  
4 events can reset the phase of these oscillations (Canavier, 2016; Voloh and Womelsdorf, 2016),  
5 linking activity of multiple neurons to process information in concert. However, the principal  
6 brain rhythms studied in behaving animals are at the time scale of cell neurophysiological  
7 processes, which are much faster (on the order of tens and hundreds of milliseconds) than real life  
8 behavioral events, which typically occur at second and supra-second time scales. The brain has  
9 several mechanisms linking these two time scales, some of which involve the hippocampus  
10 (reviewed in Banquet, et al., 2021) and associated networks, including the prefrontal cortex and  
11 striatum.

12 Little is known about brain rhythms that operate in this crucial behavioral time scale during  
13 awake behavior. The brain is indeed capable of generating rhythms on the order of 0.1-1.0 Hz,  
14 although these have been principally characterized during sleep (Steriade, 1993). Furthermore,  
15 during sleep or under anesthesia, rat noradrenergic locus caeruleus (LC) and prefrontal cortical  
16 (Pfc) neurons are phase-locked to infra-slow rhythms (Lestienne, et al., 1997; Eschenko, et al.,  
17 2012; Totah, et al., 2018). LC stimulation exerts powerful influence on neurophysiological  
18 activity in Pfc and hippocampus (Hip; Berridge and Foote, 1991). LC actions in prefrontal cortex  
19 are implicated in vigilance, decision-making, and executive function, while in Hip they are  
20 associated with learning and processing contextual information (e.g., Wagatsuma, et al., 2018;

21 Sara, 2009 for review). Since oscillations can coordinate activity in brain networks, we reasoned  
22 that there might also be rhythmicity on this behavioral time scale in awake animals, and  
23 investigated this possibility in rats performing a task engaging Pfc, Hip and LC (Oberto, et al.,  
24 2022; Xiang, et al., 2019). Such coordinated activity could provide a possible link between  
25 neuromodulation and oscillatory coordination of brain areas on the time scale of behavior.

## 26 **2 Materials and Methods**

27 All experiments were carried out in accordance with local (Comité d'éthique en matière  
28 d'expérimentation animale no. 59), institutional (Scientific Committee of the animal facilities of  
29 the Collège de France) and international (US National Institutes of Health guidelines; Declaration  
30 of Helsinki) standards, legal regulations (Certificat no. B751756), and European/national  
31 requirements (European Directive 2010/63/EU; French Ministère de l'Enseignement Supérieur et  
32 de la Recherche 2016061613071167) regarding the use and care of animals. The data analyzed  
33 here were recorded in experiments described by Xiang, et al. (2019) and further details can be  
34 found there.

### 35 **2.1 Animals**

36 Nine male Long-Evans rats (Janvier Labs, Le Genest-Saint Isle France; weight, 280–400 g) were  
37 maintained on a 12 h:12 h light-dark cycle (lights on at 7 A.M.). The rats were handled on each  
38 workday. To motivate animals for behavioral training on the T maze, food was restricted to 14 g  
39 of rat chow daily (the normal daily requirement) while water was partially restricted except for a  
40 10–30 min period daily to maintain body weight at 85% of normal values according to age. Rats  
41 were rehydrated during weekends.

### 42 **2.2 The automated T maze with return arms**

43 The behavioral task took place in an elevated automated T-maze (see Fig. 3A) consisting of a  
44 start area, a central arm, two reward arms and two return arms, which connected the reward arms  
45 to the start area. Small wells at the end of each reward arm delivered liquid reward (30 µl of  
46 0.25% saccharin solution in water) via solenoid valves controlled by a CED Power1401 system  
47 (Cambridge Electronic Design, Cambridge, UK) with a custom-written script. As the rats crossed

48 a central photo-detector, visual cues (VCs) were displayed in pseudo-random sequence on video  
49 monitors positioned behind, and parallel to the two reward arms. This is the “VC”, or “central  
50 arm PD” event. The VCs were either lit or dim uniform fields. The rat then selected the left or  
51 right arm and crossed the Reward arm (Rew) photodetector (PD), triggering reward release from  
52 an audible solenoid valve. Crossing the photodetector in the middle of the return arm of the T-  
53 maze (Return arm PD; Ret) triggered the visual cue to be turned off. Photodetectors detected task  
54 events and triggered cues and rewards via the CED Spike2 script. The sequence of left/right  
55 illumination of screens was programmed according to a pseudorandom sequence.

### 56 **2.3 Viral vector preparation and injection**

57 The Canine Adenoviral vector (CAV2-PRS-ChR2-mCherry) was produced at the University of  
58 Bristol using previously described methods (Li, et al., 2016). This CAV2 viral vector expresses  
59 channelrhopsin-2 (ChR2) under the control of PRSx8 (synthetic dopamine beta-hydroxylase  
60 promoter), which restricts the expression of the transgene to noradrenergic (NA) neurons (Figure  
61 VI.1a in Hwang, et al., 2001; also see Hickey, et al., 2014) In one rat (R328), 4 months before  
62 the electrode implant surgery, CAV2-PRS-ChR2-mCherry was injected into the right LC while  
63 the rat was anesthetized with sodium pentobarbital (40 mg/kg, with 5 mg sodium pentobarbital as  
64 a supplement every hour) intraperitoneally. The site corresponding to LC position was marked on  
65 the exposed skull for injection in right LC (AP ~3.9 mm relative to lambda, ML ~1.2 mm), and a  
66 trephine was made (~2 mm diameter). A micropipette (calibrated in 1 µl intervals, Corning  
67 Pyrex) with a tip diameter of 20 µm was connected to a Hamilton syringe, and backfilled with 1  
68 µl of the diluted viral vectors. Microinjections of 0.33 µl were made into the LC (AP -3.8~-4 mm  
69 relative to lambda, ML 1.1-1.2 mm, with a 15° rostral tilt) at three sites dorsoventrally (5.2, 5.5,  
70 5.7 mm below the brain surface). The pipette was left at each depth for an additional 3-5 min  
71 before moving down to the next site. When the injection was finished, the trephine hole was  
72 covered with sterilized wax and the scalp was sutured. The rat (R328) was observed until  
73 recovery, and was then singly housed.

### 74 **2.4 Electrode and optrode implants**

75 Following VC task pre-training, at least one day before surgery, rats were returned to ad libitum  
76 water and food. General surgical preparation is described in the previous section. Moveable

77 tungsten microelectrodes (insulated with epoxytite®, impedance = 2-4 MΩ, FHC Inc, USA) were  
78 used for LC recordings. A single microelectrode, or two or three such electrodes glued together  
79 was implanted at AP -3.8-4 mm relative to lambda, and ML 1.1-1.2 mm, with a 15° rostral tilt. A  
80 stainless steel wire (Teflon coated, diameter=178 μm, A-M systems Inc) implanted in the  
81 midbrain area about 1-2 mm anterior to the LC electrode tip served as a fixed LC reference  
82 electrode, permitting differential recording. The rat with the virus injection (R328) was implanted  
83 with an optrode composed of a tungsten microelectrode (insulated with epoxytite, impedance = 2-  
84 4 MΩ, FHC Inc, USA) glued to a 200 μm optic fiber implant with a ferrule (0.37 numerical  
85 aperture, hard polymer clad, silica core, multimode, Thorlabs), with tip distances 1 mm apart (the  
86 electrode was deeper). The optic fiber implant and optic fiber cables were constructed at the  
87 NeuroFabLab (CPN, Ste. Anne Hospital, Paris). Two screws (diameter = 1 mm, Phymep, Paris)  
88 with wire leads were placed in the skull above the cerebellum to serve as ground. LC electrodes  
89 were progressively lowered under electrophysiological control until characteristic LC spikes were  
90 identified (located ~ 5-6 mm below the cerebellar surface, see Xiang, et al., 2019 for details). For  
91 the virus-injected rat, LC spikes could also be identified by responses to laser stimulations  
92 (described below). Following implantation, the microelectrode was fixed to a micro-drive  
93 allowing for adjustments along the dorsal-ventral axis. The headstage was fixed to the skull with  
94 dental cement, and surrounded by wire mesh stabilized with dental cement for protection and  
95 shielding. After the surgery, animals were returned to their home cages for at least one-week  
96 recovery with ad libitum water and food and regular observation.

## 97 **2.5 Electrophysiological recordings**

98 Rats were then returned to dietary restriction. The movable electrodes were gradually advanced  
99 until a well-discriminated LC unit was encountered and then all channels were recorded  
100 simultaneously while the rat performed in the T-maze. If no cells could be discriminated, the  
101 electrodes were advanced and there was at least a 2 h delay before the next recording session.

102 For daily online monitoring of LC spikes, pre-amplified signals were filtered between 300-3000  
103 Hz for verification on the computer screen (Lynx-8, Neuralynx, Bozeman, MT, USA) and also  
104 transmitted to an audio monitor (audio analyzer, FHC). For recordings, brain signals were pre-  
105 amplified at unity gain (Preamp32, Noted Bt, Pecs, Hungary) and then led through a flexible

106 cable to amplifiers (x500, Lynx-8, Neuralynx) and filters (0.1-9 kHz, Lynx-8, Neuralynx). Brain  
107 signals were digitized at ~20 kHz using CED Power1401 converter and Spike2 data acquisition  
108 software. The LC unit activity was identified by: 1) spike waveform durations  $\geq 0.6$  ms; 2) low  
109 average firing rate (1-2 Hz) during quiet immobility; 3) brief responses to unexpected acoustic  
110 stimuli followed by prolonged (around 1 s) inhibition; 4) for the virus-injected rat (R328), LC  
111 units were verified by responses to laser stimulation. A laser driver (Laserglow Technologies,  
112 Canada, wavelength 473 nm) was controlled by signals from a stimulator (Grass Technologies,  
113 USA, Model SD9). Light intensity from the tip of optic fiber was measured by a power meter  
114 (Thorlabs, Germany, Model PM100D). If unit firing was entrained to the pulses with an increased  
115 rate (to at least twice the baseline firing rate) averaged over all the stimulations, they were  
116 considered to be noradrenergic LC units.

117 A light emitting diode (LED) was mounted on the cable that was plugged into the headstage. This  
118 was detected by a video camera mounted above the T-maze and transmitted to the data  
119 acquisition system at a sampling rate of ~30 Hz for the purpose of position tracking.

## 120 **2.6 Tissue processing**

121 After all recording experiments, electrolytic lesions (40  $\mu$ A, 10 s cathodal current) were made at  
122 the tip of the electrodes. Brain slices were cut coronally at a thickness of 40  $\mu$ m with a freezing  
123 microtome and were collected in cold 0.1 M PB for Nissl staining. Recordings at sites with  
124 reconstructed electrode positions outside LC proper were excluded from analysis. For fluorescent  
125 immunohistochemistry, sections were then incubated in primary antibodies overnight at 4°C in  
126 darkness with both chicken anti-tyrosine hydroxylase (TH) antibody (1:500, Abcam) and mouse  
127 anti-mCherry antibody (1:200, Ozyme) in PBS containing 0.1% Triton X-100 and 3% NGS.  
128 After three 5 min rinses in PBS, sections were then incubated with secondary antibodies in PBS  
129 containing 3% NGS for 1h at RT in darkness. Secondary antibodies used in this study were Alexa  
130 Fluor 488 goat anti-chicken IgG (1:3000, Life Technologies) and Alexa Fluor 546 goat anti-  
131 mouse IgG (1:3000, Life Technologies).

132

## 133 **2.7 Signal processing, spike sorting and data analyses**

134 For off-line spike detection of LC activity in three of the rats, the wide-band signals were  
135 converted and digitally high-pass filtered (nonlinear median-based filter). Waveforms with  
136 amplitudes passing a threshold were extracted, and then subjected to principal component  
137 analysis (PCA). All of these processes were performed with NDManager (Hazan, et al., 2006).  
138 Spikes were sorted with a semi-automatic cluster cutting procedure combining KlustaKwik (KD  
139 Harris, <http://klustakwik.sourceforge.net>) and Klusters (Hazan, et al., 2006). Spikes with  
140 durations less than 0.6 ms were rejected. In one rat (R311), the LC signal was filtered from 300-  
141 3000 Hz during recording, and the spike sorting was performed with Spike2 software (which  
142 employs a waveform template-matching algorithm). Most data analyses were performed using  
143 Matlab (R2010a) with the statistical toolbox FMAToolbox (developed by M. Zugaro,  
144 <http://fmatoolbox.sourceforge.net>) and scripts developed in the laboratory as well as some  
145 statistical analyses performed with Microsoft© Excel©. To characterize periods with infra-slow  
146 rhythms, a criterion for salient phase-locking to task events was established as when the SEM  
147 range of LFP phase was less than  $0.75 \cdot \pi$  radians (cf., Figure 4, middle column). This is termed  
148 “regular phase-locking”. Sessions tallied for phase-locking of LC neurons to infra-slow rhythms  
149 were included only if they had at least 1000 LC neuron spikes.

## 150 **3 Results**

### 151 **3.1 LC neuron phase-locking to prefrontal and hippocampal infra-slow rhythms**

152 Infra-slow rhythms were readily apparent in visual inspections of hippocampal (Hip) and  
153 prefrontal cortical (Pfc) local field potentials (LFPs) (Fig. 1A). These were rendered more salient  
154 by filtering the signal in a 0.1-1.0 Hz window (Fig. 1B). We applied an amplitude threshold to  
155 examine data from those periods when the infra-slow rhythm amplitude was elevated (Fig. 1C).  
156 In each of five rats, LC neurons were phase-locked to Pfc (e.g., Figs. 1D and 2), as well as Hip  
157 infra-slow LFP rhythms. The incidence of phase-locking of the LC neurons in sessions with  
158 regular phase-locking of the infra-slow rhythms to task events was 20 out 23 for Hpc LFP and  
159 15/20 for Pfc LFP (Rayleigh test,  $p < 0.05$ ; for histology, see Fig. 2 of Xiang, et al., 2019). In the  
160 animal where noradrenergic LC neurons were identified optogenetically (see Methods), all were  
161 phase-locked to the infra-slow rhythms ( $n=8$  for both Pfc and Hip; Rayleigh test,  $p < 0.05$ ).

162 The modal preferred infra-slow phase among these neurons was  $0.35*\pi$  radians for Hip infra-  
163 slow and  $0.15*\pi$  radians for Pfc infra-slow ( $p<0.05$ , Rayleigh test; not shown).

### 164 **3.2 Prefrontal and hippocampal infra-slow rhythms are synchronized to maze events**

165 The infra-slow rhythms were phase-locked to task-relevant positions on the maze (Fig. 3B; Supp.  
166 Fig. 1B). To quantify this phase-locking, the mean ( $\pm$  SEM) phase of the rhythm was plotted in  
167 peri-event time color plots (see Fig. 4 and Supp. Fig. 1A for examples) over all trials in 57  
168 sessions from eight rats (including the five with LC recordings). Infra-slow rhythms were phase-  
169 locked to the reward arm photodetector crossing (Rwd) in 51 of the recording sessions for Hip,  
170 and 46 sessions for Pfc (see Table 1). The other maze events had fewer incidences of regular  
171 phase-locking (Pfc return arm photodetector crossing, or Rtn: 11; Pfc central arm visual cue onset  
172 PD, or VC: 18; Hip Rtn: 18; Hip VC: 20). The mean phases at the respective PD crossings (in  
173 those cases when  $SEM \leq 0.75*\pi$  radians there) were  $0.70*\pi$  and  $0.24*\pi$  radians for Pfc and Hip  
174 Rtn,  $0.25*\pi$  and  $0.22*\pi$  radians for Pfc and Hip Rwd, and  $0.19*\pi$  and  $0.01*\pi$  radians for Pfc and  
175 Hip VC. The root-mean-square differences between Pfc and Hip mean phase (calculated pairwise  
176 by session) at the respective PD crossings were  $0.14*\pi$ ,  $0.13*\pi$  and  $0.12*\pi$  rad. The regular  
177 phase-locking could last from less than one to over 2.5 successive rhythmic cycles (Supp. Figs. 1,  
178 and 2, Table 1) and could continue from one event to the next (Fig. 4, Supp. Fig. 1). For PL Rwd  
179 and Hip Rwd, 30 and 37 sessions had durations of regular phase-locking lasting one or more  
180 cycles, respectively. These permitted quantification of the temporal duration of the cycles, which  
181 ranged from 2.0 to 2.6 s, the equivalent of 0.4 to 0.5 Hz. In the six cases of Rwd PD phase-  
182 locking which had a second complete cycle, the mean of the first was 2.3 s, while the second was  
183 lower, 2.0 s (pairwise t-test,  $p=0.0009$ ,  $df=5$ ). Thus, these are not regular periodic oscillations,  
184 but, rather, this is consistent with phase-locking to task events. Pfc and Hip infra-slow rhythms  
185 sometimes resembled one another (e.g., Fig. 2). To compare them, sessions were classified as  
186 having Pfc and Hip regular phase-locking in the following ranges of cycles (see Table 1). In 17 of  
187 the 57 sessions, these numbers of cycles were different between Pfc and Hip for VC, Rwd and/or  
188 Rtn (e.g., Supp. Fig. 2). This indicates that it is unlikely that Pfc and Hip infra-slow rhythms are  
189 related by volume conduction, and suggests that they could be independently generated.



190 The infra-slow rhythms were regularly phase-locked to two (in 24 sessions), or even all three (in  
191 8 sessions) different task events. Thus, they were not linked to any specific task-related behavior.  
192 To test whether infra-slow rhythms were triggered by rapid head movements, regression analysis  
193 compared the onset of regular phase-locking and times of peak acceleration, or deceleration  
194 around the Rwd PD crossings, and were not significant ( $r^2=0.034$ ,  $p=0.49$  and  $r^2=0.0056$ ,  $p=0.80$   
195 respectively;  $df=15$ ; see Supp. Fig. 3). In Xiang et al. (2019), we showed that LC neurons fire  
196 more during accelerations. Indeed, the periods with the greatest increase in LC activity were not  
197 those most frequent for the start of regular phase-locking (i.e., reset) of the infra-slow rhythm;  
198 rather phase-locking occurred most frequently to Rwd PD crossing (see above), where no  
199 consistent accelerations occurred (see Supp. Figs. 3 and 4). These results indicate it is unlikely  
200 that Pfc and Hip infra-slow rhythms are due to a biomechanical artifact, for example, from  
201 locomotion or head rocking.

### 202 **3.3 Coordination of neuronal activity across time scales**

203 In the four sessions where Hip and Pfc neurons could be discriminated from the LFP electrodes,  
204 most were also modulated by infra-slow rhythms (Pfc LFP modulated 6/12 Pfc units and 8/11  
205 Hip units; Hip LFP modulated 8/12 Pfc units and 8/11 Hip units; Rayleigh test  $p<0.05$ ). The LC  
206 neurons could have relatively consistent phases with respect to the two infra-slow rhythms (not  
207 shown). LC neurons could be phase-locked to oscillations in the delta frequency range (1-4 Hz)  
208 in Pfc ( $n=15/37$ ) and Hip (11/37) as well as theta (5-10 Hz; 7/37 and 5/37 respectively) for Pfc  
209 and Hip. While phase-locking of LC neurons to gamma (40-80 Hz) was rare ( $n=2$  for both  
210 structures' LFPs), the infra-slow rhythm did modulate the amplitude of gamma oscillations at 35-  
211 45 Hz in hippocampus and prefrontal cortex (Fig. 5).

## 212 **4 Discussion**

213 LFP oscillation cycles on the order of 0.4 Hz in prefrontal cortex and hippocampus were phase-  
214 locked to task events at crucial points on the maze. Successive cycles had different cycle lengths,  
215 indicating that, if they are indeed periodic oscillations, their phase can reset to salient events.  
216 Simultaneous recordings in prefrontal cortex and hippocampus could have different cycle lengths  
217 as well, while still phase-locking to task events. This would seem to exclude any single structure  
218 from entraining these independent rhythms simultaneously. This also would rule out a

219 contribution of volume conduction. The intriguing issue of the origin of these rhythms merits  
220 further investigation. Most of the LC neurons were phase-locked to these infra-slow prefrontal  
221 cortical and hippocampal LFPs, including all of the optogenetically identified noradrenergic  
222 neurons. Hippocampal and prefrontal units were also phase-locked to the infra-slow oscillations.  
223 While the number of LC neurons recorded may appear low, this is typical for the rare chronic  
224 recording studies of this structure in behaving rats, likely because its diminutive dimensions and  
225 deep location render accurate electrode placements challenging.

226 This is consistent with previous work showing neuronal activity adapting to the time scale of  
227 behavioral events. For example, in behavioral tasks with delays, several brain structures show  
228 “time cell” activity: neurons with sequential “tiling” activity lasting on the order of several  
229 seconds. These periods can expand or contract depending upon the duration of task-imposed  
230 intervals (MacDonald, et al., 2011). We speculate that this infra-slow rhythm may originate in the  
231 hippocampal-prefrontal system since neuro-physiological activity there tracks time intervals on  
232 the order of several seconds based upon regularities in temporal structure of behavioral or  
233 environmental events.

234 Steriade, et al. (1993) observed infra-slow (0.3-1.0 Hz) rhythms in neocortical activity in  
235 anesthetized and naturally sleeping cats. Eschenko et al (2012) showed that LC neuronal activity  
236 in sleeping rats is synchronized with the sleep infra-slow wave cycle (1 Hz) and is out of phase  
237 with Pfc neuronal activity. Similarly, in rats under ketamine anesthesia, there is a negative  
238 correlation between activity of LC NE neurons and prefrontal neurons, when neuron activation  
239 oscillates at ~1 Hz (Sara and Hervé-Minvielle 1995; Lestienne, et al. 1997). Furthermore, when  
240 the latter authors pooled their LC recording data, they were significantly phase-locked to cortical  
241 LFP delta oscillations. While these infra-slow cycles of UP-DOWN state transitions are not  
242 generally observed in awake animals, this does demonstrate that LC can fire rhythmically, and  
243 that these structures can coordinate their activity at this time scale. Furthermore, in rats under  
244 urethane anesthesia, Totah, et al. (2018) found that the firing rate of locus coeruleus neurons  
245 oscillates at 0.4-0.5 Hz. And, in head-fixed awake mice, cortical noradrenergic axons exhibited  
246 rhythmic  $Ca^{2+}$  activity at 0.5–0.6 Hz (Oe, et al., 2020). Thus, the LC could also be associated  
247 with the Pfc-Hip in the origin, maintenance and communication of behaviorally relevant infra-

248 slow rhythms in the brain. Further work is required to elucidate the respective roles of these  
249 structures in these processes.

250 In the awake state, there is evidence for infra-slow neural processing although this was not  
251 observed as rhythms per se. Molter, et al. (2012) observed a 0.7 Hz modulation of the power of  
252 theta rhythm recorded in rat Hip. This 0.7 Hz modulated Hip neuronal activity during sleep, as  
253 well as during behavior in a maze, a running wheel, and an open field. Positions on a figure-8  
254 maze corresponded to specific phases of this modulatory rhythm, similar to the infra-slow rhythm  
255 recorded here. (Their filter settings excluded 0.7 Hz rhythms and thus this could not be directly  
256 measured in that work.) In Molter et al. (2012), the 0.7 Hz modulation of the power of the theta  
257 infra-slow modulation was locked at  $\pi$  radians to junction points in the maze (their Figure 7B),  
258 where accelerations might be expected. However, they found no overall correlation between  
259 phase and acceleration. Halgren et al. (2018) observed a rhythm at less than 3 Hz generated in the  
260 superficial layers of the cerebral cortex in awake humans. The phase of this rhythm reset to  
261 infrequent tones in their oddball task, similar to the reset of the infra-slow rhythm here in relation  
262 to salient task events.

263 Villette, et al. (2015) used calcium imaging to observe CA1 pyramidal cells in head fixed mice  
264 moving in the dark on a non-motorized treadmill. They found that different neurons fired  
265 sequentially in cycles at the same time scale as the infra-slow oscillations observed here.  
266 Furthermore, the cycles could occur singly, or consecutively in groups of two or three. The  
267 authors interpreted this as representing an intrinsic metric for representing distance walked. This  
268 resembles time cell activity (Pastalkova et al., 2008; MacDonald et al., 2011) evoked above,  
269 where the length of the cycle extends to the time scale of the ongoing task (Kraus, et al., 2013;  
270 Ravassard, et al., 2013). The 2 to 5 s durations of the cycles in the Villette, et al. (2015) study  
271 may represent a default value since their task had no temporal structure. This is on the order of  
272 the time scale of the infra-slow rhythm recorded here, and the variable numbers of cycles they  
273 observed might flexibly adapt to the positions of task-relevant events to lead to the results found  
274 here.

275 The present observations of phase-locking of LC neurons to infra-slow rhythms in hippocampus  
276 could ostensibly be due to independent synchrony of the infra-slow rhythms and the LC neurons

277 to task events. However, the LC neurons showed phase preferences in the infra-slow rhythms in  
278 data pooled over multiple task events. We did not observe any simple relation between infra-slow  
279 rhythms and motor events (e.g., as we showed for LC neurons with acceleration or deceleration  
280 by Xiang, et al., 2019), since regular phase-locking could start before (Supp. Fig. 1) or after the  
281 same task events in different sessions (not shown), and continue over periods including a variety  
282 of behaviors.

283 The phase-locking of LC neurons to infra-slow rhythms in Hip and Pfc, as well as to oscillations  
284 in the delta, theta and gamma frequency bands could reveal coordinated neuronal processing  
285 within a unified temporal framework (cf., Totah, et al., 2018a). The scale of this corresponded to  
286 the temporal and spatial regularities characterizing the current behavioral patterns. Cross-  
287 frequency coupling could serve as a mechanism to link processing at different time scales. This  
288 could facilitate both ‘Communication through coherence’ (CTC, Bosman et al., 2012; Fries,  
289 2005) and ‘Binding by synchrony’ (Eckhorn, et al., 1990; Engel, et al., 1999; Buehlmann and  
290 Deco, 2010). Thus, infra-slow rhythms would serve as a scaffold to link the time scales of  
291 dynamics of neuronal processes to those of behavior and cognitive processes. Noradrenaline,  
292 released by LC neurons in concert with the infra-slow rhythm, would participate in synchronizing  
293 or resetting those brain networks underlying behavioral adaptation to these events (Bouret and  
294 Sara, 2005; Sara and Bouret, 2012).

## 295 **5 Competing interests**

296 The authors declare that the research was conducted in the absence of any commercial or  
297 financial relationships that could be construed as a potential conflict of interest.

## 298 **6 Author contributions**

299 S.I.W. and L.X. designed the experiments; S.J.S. and L.X. developed and implemented the LC  
300 optogenetics and recordings; L.X. and H.Y.G. performed the experiments; L.X., S.I.W., R.T.,  
301 A.H. and S.J.S. designed the analyses; L.X., R.T., and A.H. performed the analyses; S.J.S.,  
302 S.I.W., and L.X. wrote the paper. All authors approved of the final version of the manuscript.

303

## 304 **7 Funding**

305 L.X. was supported by a fellowship from the China Scholarship Council (CSC). The Labex  
306 Memolife and Fondation Bettencourt Schueller provided support.

## 307 **8 Acknowledgements**

308 Thanks to Professor Anthony E. Pickering for providing the virus and related advice. Thanks to  
309 Dr. Michaël Zugaro for helpful suggestions and help with analyses and computing, Drs. A Sirota  
310 and X Leinkugel for helpful discussions, and France Maloumian for help with figures.

## 311 **9 Contribution to the field statement**

312 Periodic oscillations of excitability coordinate neuronal activity within and between brain  
313 structures for perception, cognition and goal-directed behavior, processes implicating  
314 noradrenergic activity in forebrain circuits. To better understand the link between the time scales  
315 of behavior (on the order of seconds) and underlying neuronal processing (on the order of  
316 milliseconds), we recorded phase-locking of neurons in the noradrenergic locus coeruleus to  
317 brain oscillations in rats performing in a maze. Most neurons synchronized with hippocampal and  
318 prefrontal cortical infra-slow (~0.4 Hz) rhythms. The infra-slow rhythms phase-locked to  
319 principal events in the maze, and thus were not strictly periodic. They modulated the amplitude of  
320 gamma rhythms, known to coordinate neuron activity, and thus could provide a scaffold linking  
321 behavior to neuronal activity.

## 322 **10 References**

323 Berridge, C.W., and Foote, S.L. (1991). Effects of locus coeruleus activation on  
324 electroencephalographic activity in neocortex and hippocampus. *J. Neurosci.* 11(10), 3135-45.  
325 doi: 10.1523/JNEUROSCI.11-10-03135.1991

326 Bosman, C.A., Schoffelen, J.-M., Brunet, N., Oostenveld, R., Bastos, A.M., Womelsdorf, T., et  
327 al. (2012). Attentional stimulus selection through selective synchronization between monkey  
328 visual areas. *Neuron.* 75, 875–888. doi: 10.1016/j.neuron.2012.06.037.

- 329 Bouret, S., and Sara, S.J. (2005). Network reset: a simplified overarching theory of locus  
330 coeruleus noradrenaline function. *Trends Neurosci.* 28(11), 574-82. doi:  
331 10.1016/j.tins.2005.09.002
- 332 Buehlmann, A., and Deco, G. (2010). Optimal information transfer in the cortex through  
333 synchronization. *PLoS Comput. Biol.* 6. doi: 10.1371/journal.pcbi.1000934
- 334 Canavier, C.C. (2015). Phase-resetting as a tool of information transmission. *Curr. Opin.*  
335 *Neurobiol.* 31, 206-213. doi:10.1016/j.conb.2014.12.003
- 336 Eckhorn, R., Reitboeck, H.J., Arndt, M., and Dicke, P. (1990). Feature linking via  
337 synchronization among distributed assemblies: Simulations of results from cat visual cortex.  
338 *Neural Comput.* 2, 293–307. <https://doi.org/10.1162/neco.1990.2.3.293>
- 339 Engel, A.K., Fries, P., König, P., Brecht, M., and Singer, W. (1999). Temporal binding, binocular  
340 rivalry, and consciousness. *Conscious. Cogn.* 8, 128–51.
- 341 Eschenko, O., Magri, C., Panzeri, S., and Sara, S.J. (2012). Noradrenergic neurons of the locus  
342 coeruleus are phase-locked to cortical Up-Down states during sleep. *Cereb. Cortex* 22(2), 426-43.  
343 doi:10.1093/cercor/bhr121
- 344 Fries, P.A. (2005). A mechanism for cognitive dynamics: neuronal communication through  
345 neuronal coherence. *Trends Cogn. Sci.* 9, 474–80. doi: 10.1016/j.tics.2005.08.011.
- 346 Halgren, M., Fabó, D., Ulbert, I., Madsen, J.R., Eröss, L., Doyle, W.K., et al. (2018). Superficial  
347 slow rhythms integrate cortical processing in humans. *Sci. Rep.* 8(1), 2055. doi: 10.1038/s41598-  
348 018-20662-0.
- 349 Hazan, L., Zugaro, M., and Buzsáki, G. (2006). Klusters, NeuroScope, NDManager: A free  
350 software suite for neurophysiological data processing and visualization. *J. Neurosci. Meth.* 155,  
351 207–216. doi: 10.1016/j.jneumeth.2006.01.017.

- 352 Hickey, L., Li, Y., Fyson, S.J., Watson, T.C., Perrins, R., Hewinson, J., et al. (2014).  
353 Optoactivation of locus ceruleus neurons evokes bidirectional changes in thermal nociception in  
354 rats. *J. Neurosci.* 34, 4148–4160. DOI: 10.1523/JNEUROSCI.4835-13.2014
- 355 Hwang, D.Y., Carlezon, W.A., Isacson, O., and Kim, K.S. (2001). A high-efficiency synthetic  
356 promoter that drives transgene expression selectively in noradrenergic neurons. *Human Gene*  
357 *Ther.* 12, 1731–1740. doi: 10.1089/104303401750476230.
- 358 Kraus, B.J., Robinson, R.J., 2nd, White, J.A., Eichenbaum, H., and Hasselmo, M.E. (2013).  
359 Hippocampal “time cells”: time versus path integration. *Neuron* 78, 1090–1101. doi:  
360 10.1016/j.neuron.2013.04.015.
- 361 Lestienne, R., Hervé, A., Robinson, D., Brios, L., and Sara, S.J. (1997). Slow oscillations as a  
362 probe of the dynamics of the locus coeruleus-frontal cortex interaction in anesthetized rats. *J.*  
363 *Physiology (Paris)* 91, 273-284. doi: 10.1016/s0928-4257(97)82407-2.
- 364 Li, Y., Hickey, L., Perrins, R., Werlen, E., Patel, A.A., Hirschberg, S., et al. (2016). Retrograde  
365 optogenetic characterization of the pontospinal module of the locus coeruleus with a canine  
366 adenoviral vector. *Brain Res.* 1641(Pt. B), 274–290. doi: 10.1523/JNEUROSCI.4835-13.2014
- 367 MacDonald, C., Lepage, K., Eden, U., and Eichenbaum, H. (2011). Hippocampal “time cells”  
368 bridge the gap in memory for discontinuous events. *Neuron* 71(4), 737–749. doi:  
369 10.1016/j.neuron.2011.07.012.
- 370 Molter, C., O’Neill, J., Yamaguchi, Y., Hirase, H., and Leinekugel, X. (2012). Rhythmic  
371 modulation of theta oscillations supports encoding of spatial and behavioral information in the rat  
372 hippocampus. *Neuron* 75, 889–903. doi: 10.1016/j.neuron.2012.06.036
- 373 Oberto, V.J., Boucly, C.J., Gao, H., Todorova, R., Zugaro, M.B., and Wiener, S.I. (2022).  
374 Distributed cell assemblies spanning prefrontal cortex and striatum. *Curr Biol.* 32(1), 1-13.e6.  
375 doi: 10.1016/j.cub.2021.10.007

- 376 Oe, Y., Wang, X., Patriarchi, T., Konno, A., Ozawa, K., Yahagi, K., et al. (2020). Distinct  
377 temporal integration of noradrenaline signaling by astrocytic second messengers during vigilance.  
378 Nat. Comm. 11(1), 471. doi: 10.1038/s41467-020-14378-x
- 379 Pastalkova, E., Itskov, V., Amarasingham, A., and Buzsáki, G. (2008). Internally generated cell  
380 assembly sequences in the rat hippocampus. Science 321(5894), 1322-7. doi:  
381 10.1126/science.1159775.
- 382 Ravassard, P., Kees, A., Willers, B., Ho, D., Aharoni, D., Cushman, J., et al. (2013).  
383 Multisensory control of hippocampal spatiotemporal selectivity. Science 340, 1342–1346.  
384 doi: 10.1126/science.1232655
- 385 Sara, S.J. (2009). The locus coeruleus and noradrenergic modulation of cognition. Nat Rev  
386 Neurosci. 10(3), 211-23. doi: 10.1038/nrn2573.
- 387 Sara, S.J., and Bouret, S. (2012). Orienting and reorienting: the locus coeruleus mediates  
388 cognition through arousal. Neuron 76(1), 130-41. doi: 10.1016/j.neuron.2012.09.011.
- 389 Sara, S.J., and Hervé-Minvielle, A. (1995). Inhibitory influence of frontal cortex on locus  
390 coeruleus neurons. Proc. Nat. Acad. Sci. (USA) 92, 6032-6036. doi: 10.1073/pnas.92.13.6032.
- 391 Steriade, M., Contreras, D., Curro Dossi, R., and Nunez, A. (1993). The infra-slow (<1 Hz)  
392 oscillation in reticular thalamic and thalamocortical neurons: scenario of sleep rhythm generation  
393 in interacting thalamic and neocortical networks. J. Neurosci. 13, 3284-3299. doi:  
394 10.1523/JNEUROSCI.13-08-03284.1993.
- 395 Totah, N.K., Neves, R.M., Panzeri, S., Logothetis, N.K., and Eschenko, O. (2018). The locus  
396 coeruleus is a complex and differentiated neuromodulatory system. Neuron. 99(5), 1055-1068.e6.  
397 doi: 10.1016/j.neuron.2018.07.037.
- 398 Totah, N.K.B., Logothetis, N.K., and Eschenko, O. (2019). Noradrenergic ensemble-based  
399 modulation of cognition over multiple timescales. Brain Res. 1709, 50-66. doi:  
400 10.1016/j.brainres.2018.12.031.



401 Villette, V., Malvache, A., Tressard, T., Dupuy, N., and Cossart, R. (2015). Internally recurring  
402 hippocampal sequences as a population template of spatiotemporal information. *Neuron*. 88(2),  
403 357-66. doi: 10.1016/j.neuron.2015.09.052\_

404 Voloh, B., and Womelsdorf, T. (2016). A role of phase-resetting in coordinating large scale  
405 neural networks during attention and goal-directed behavior. *Front. Syst. Neurosci.* 10, 18.  
406 doi: 10.3389/fnsys.2016.00018

407 Wagatsuma, A., Okuyama, T., Sun, C., Smith, L.M., Abe, K., and Tonegawa, S. (2018). Locus  
408 coeruleus input to hippocampal CA3 drives single-trial learning of a novel context. *Proc. Natl.*  
409 *Acad. Sci. (USA)* 115(2), E310-E316. doi: 10.1073/pnas.1714082115.

410 Womelsdorf, T., Schoffelen, J.M., Oostenveld, R., Singer, W., Desimone, R., Engel, A.K., et al.  
411 (2007). Modulation of neuronal interactions through neuronal synchronization. *Science* 316,  
412 1609–1612. doi: 10.1126/science.1139597

413 Xiang, L., Harel, A., Gao, H., Pickering, A.E., Sara, S.J., and Wiener, S.I. (2019). Behavioral  
414 correlates of activity of optogenetically identified locus coeruleus noradrenergic neurons in rats  
415 performing T-maze tasks. *Sci. Rep.* 9(1), 1361. doi: 10.1038/s41598-018-37227-w.

## 416 **11 Figure Legends**

417 Figure 1. Calculation of LC spike phase relative to Hip or Pfc LFP. A) Unfiltered signal of a  
418 hippocampal recording, with theta oscillations dominating. B) The signal from A band-pass  
419 filtered at 0.1-1.0 Hz. Red dots indicate LC neuron action potentials in all panels. C) The  
420 amplitude of the signal in B was z-scored. Low amplitude oscillations were excluded from  
421 analyses according to an (arbitrary) criterion of  $z \leq 0$  (excluded zones are demarcated by the dotted  
422 rectangles). D) Phase of the filtered signal in B. Note that the LC spikes generally occur at phases  
423 between 0 and  $\pi/2$  radians in this example. The discontinuities near 138.5 and 143 s correspond  
424 to excluded data, where phase could not be computed reliably.

425 Figure 2. Spike phase-locking to infra-slow rhythms from two example LC neurons. Radius  
426 values are spike counts. Red arrows represent resultant vectors.

427 Figure 3. A) The automated behavioral task. When the trained rat crosses the central arm  
428 photodetector (VC onset PD), this triggers one of the two cue screens behind the reward arms to  
429 be lit in pseudo-random sequence. Crossing the appropriate reward delivery PD triggers a drop of  
430 sweetened water to arrive at the corresponding reward site. Crossing the VC OFF PD's on the  
431 return arms triggers the lit screen to be turned off. These three photodetector events are used to  
432 synchronize activity in other Figures. B) Distribution of mean phase (left) and p-values of phase-  
433 locking (right; Rayleigh test) for Pfc infra-slow oscillations in pooled data from multiple sessions  
434 (top), and in an example session (bottom).

435 Figure 4. An example of simultaneous recordings of Pfc and Hip LFP infra-slow oscillations  
436 phase-locked to principal maze events, the PD crossings (at time zero). Each row of the color  
437 plots corresponds to a single trial. The phase of the infra-slow LFP is color-coded. Black rings  
438 correspond to the PD crossing prior to (left) or after (right) the event at zero for each plot. Note  
439 that the time scales vary among the events, in order to display prior and subsequent PD's. The  
440 traces in the 2<sup>nd</sup> and 4<sup>th</sup> rows show mean phase and dashed lines are  $\pm$ SEM. In the middle  
441 column, the blue vertical bars and blue double-headed arrow illustrate the calculation of the range  
442 of regular phase-locking (defined here as the period with the criterion of SEM range  $< 0.75 * \pi$   
443 radians; pink double-headed arrows). Here, desynchronization (zones with wider SEM ranges)  
444 and discontinuities in the mean phase result from inter-trial variability in speed and distance from  
445 the synchronization point. (PD - photodetector crossing). This is from the same session as the  
446 recording in Fig. 3B.

447 Figure 5. Example of infra-slow modulation of gamma rhythm LFP in Pfc (top) and Hip  
448 (bottom).

449

450 **12 Table**

|                        | Pfc Rtn | Pfc Rwd | Pfc VC | Hip Rtn | Hip Rwd | Hip VC |
|------------------------|---------|---------|--------|---------|---------|--------|
| <1 cycle (n)           | 4       | 16      | 10     | 13      | 14      | 9      |
| 1 to 1.49 cycles (n)   | 6       | 20      | 6      | 3       | 28      | 8      |
| 1.5 to 1.99 cycles (n) | 1       | 6       | 2      | 2       | 7       | 3      |
| 2 to 2.49 cycles (n)   |         | 4       |        |         | 1       |        |
| 2.5 to 3 cycles (n)    |         |         |        |         | 1       |        |
| Mean cycle period (s)  | 2.48    | 2.22    | 2.05   | 2.62    | 2.45    | 2.32   |
| Mean frequency (Hz)    | 0.40    | 0.45    | 0.49   | 0.38    | 0.41    | 0.43   |

451

452 Table 1. Characterization of periods in sessions with regular phase-locking ( $SEM \leq 0.75 * \pi$   
453 radians) of infra-slow LFP oscillations in prefrontal cortex (Pfc) and hippocampus (Hip) to task  
454 events. In the six cases of two or more cycles, only data from the first cycle were counted for  
455 mean cycle period and frequency. Cycles are only counted in the period from the previous trial  
456 event to the next one, even though successive cycles could extend before or after (cf., Fig. 4,  
457 Supp. Fig. 1).

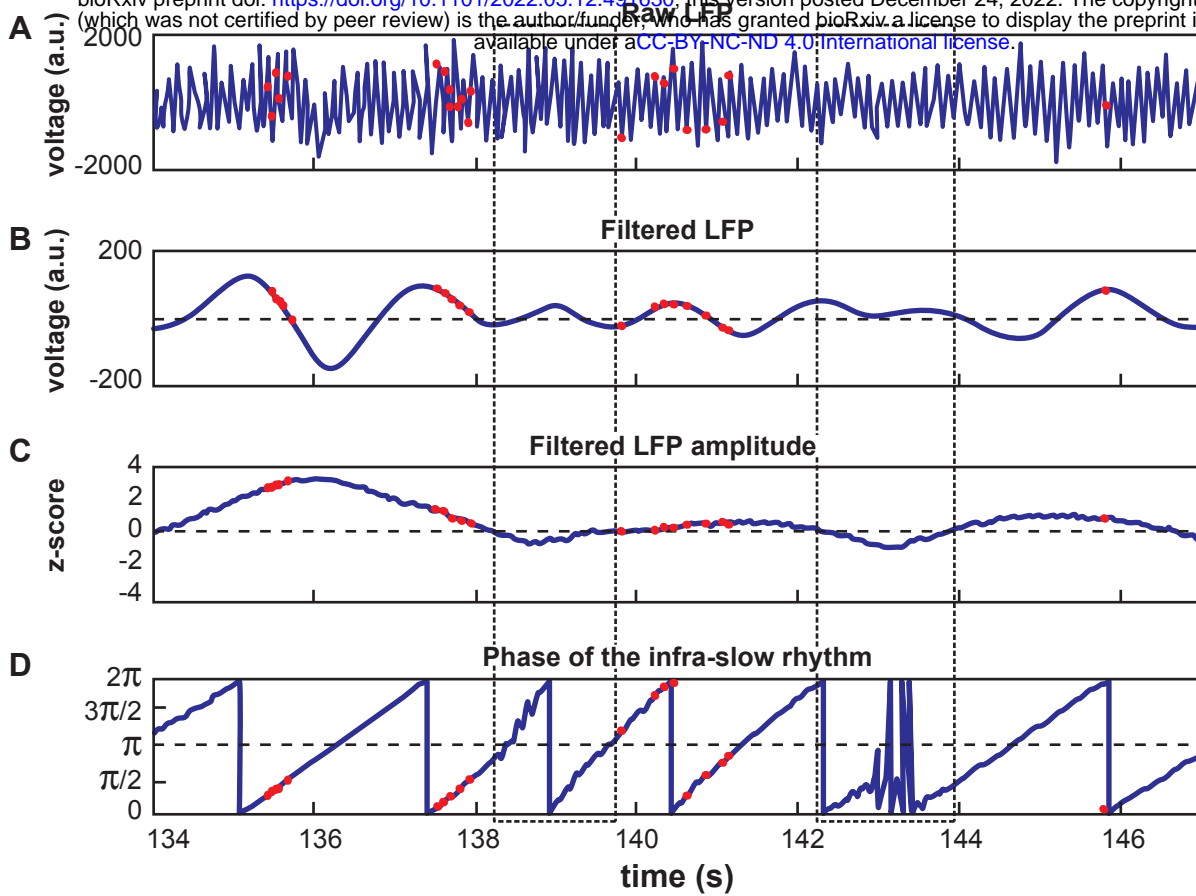

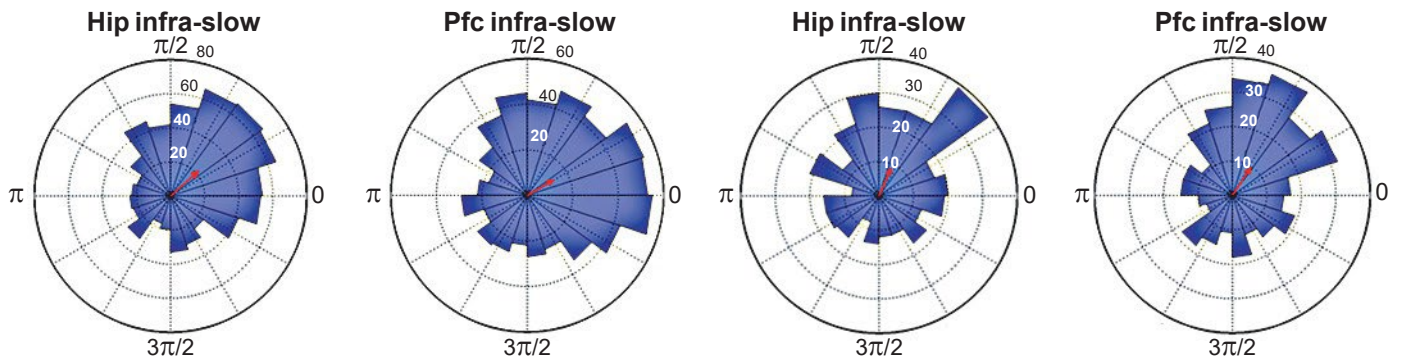

Figure 2. Spike phase-locking to infra-slow rhythms from two example LC neurons. Radius values are spike counts. Red arrows represent resultant vectors.

A

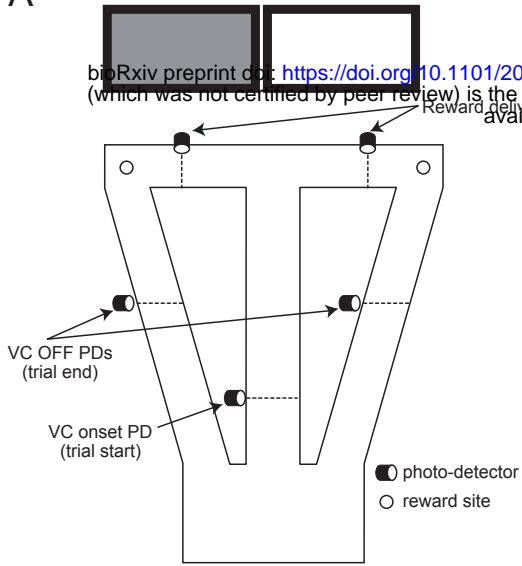

B

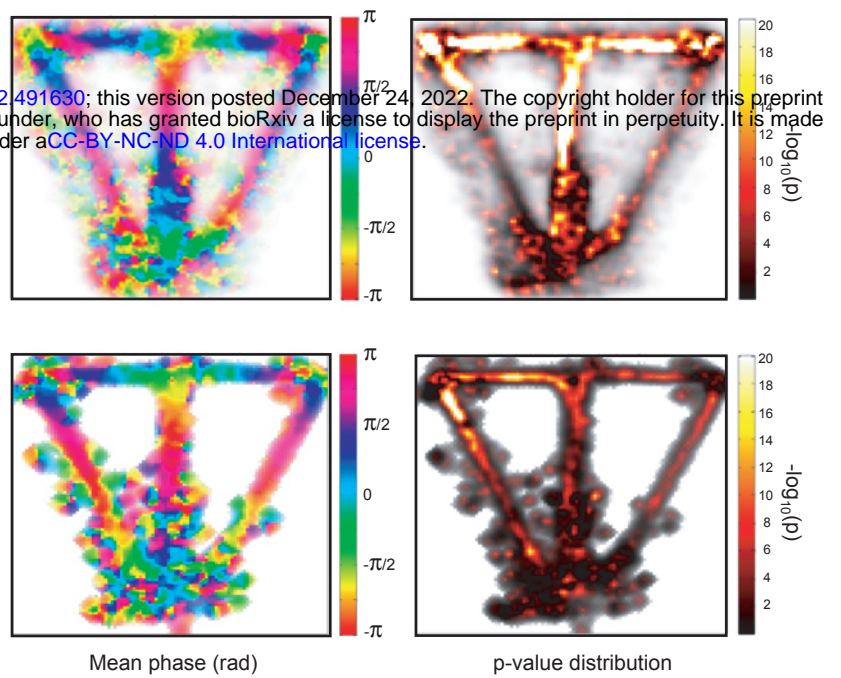

Figure 3. A) The automated behavioral task. When the trained rat crosses the central arm photodetector (VC onset PD), this triggers one of the two cue screens behind the reward arms to be lit in pseudo-random sequence. Crossing the appropriate reward delivery PD triggers a drop of sweetened water to arrive at the corresponding reward site. Crossing the VC OFF PD's on the return arms triggers the lit screen to be turned off. These three photodetector events are used to synchronize activity in other Figures. B) Distribution of mean phase (left) and p-values of phase-locking (right; Rayleigh test) for Pfc infra-slow oscillations in pooled data from multiple sessions (top), and in an example session (bottom).

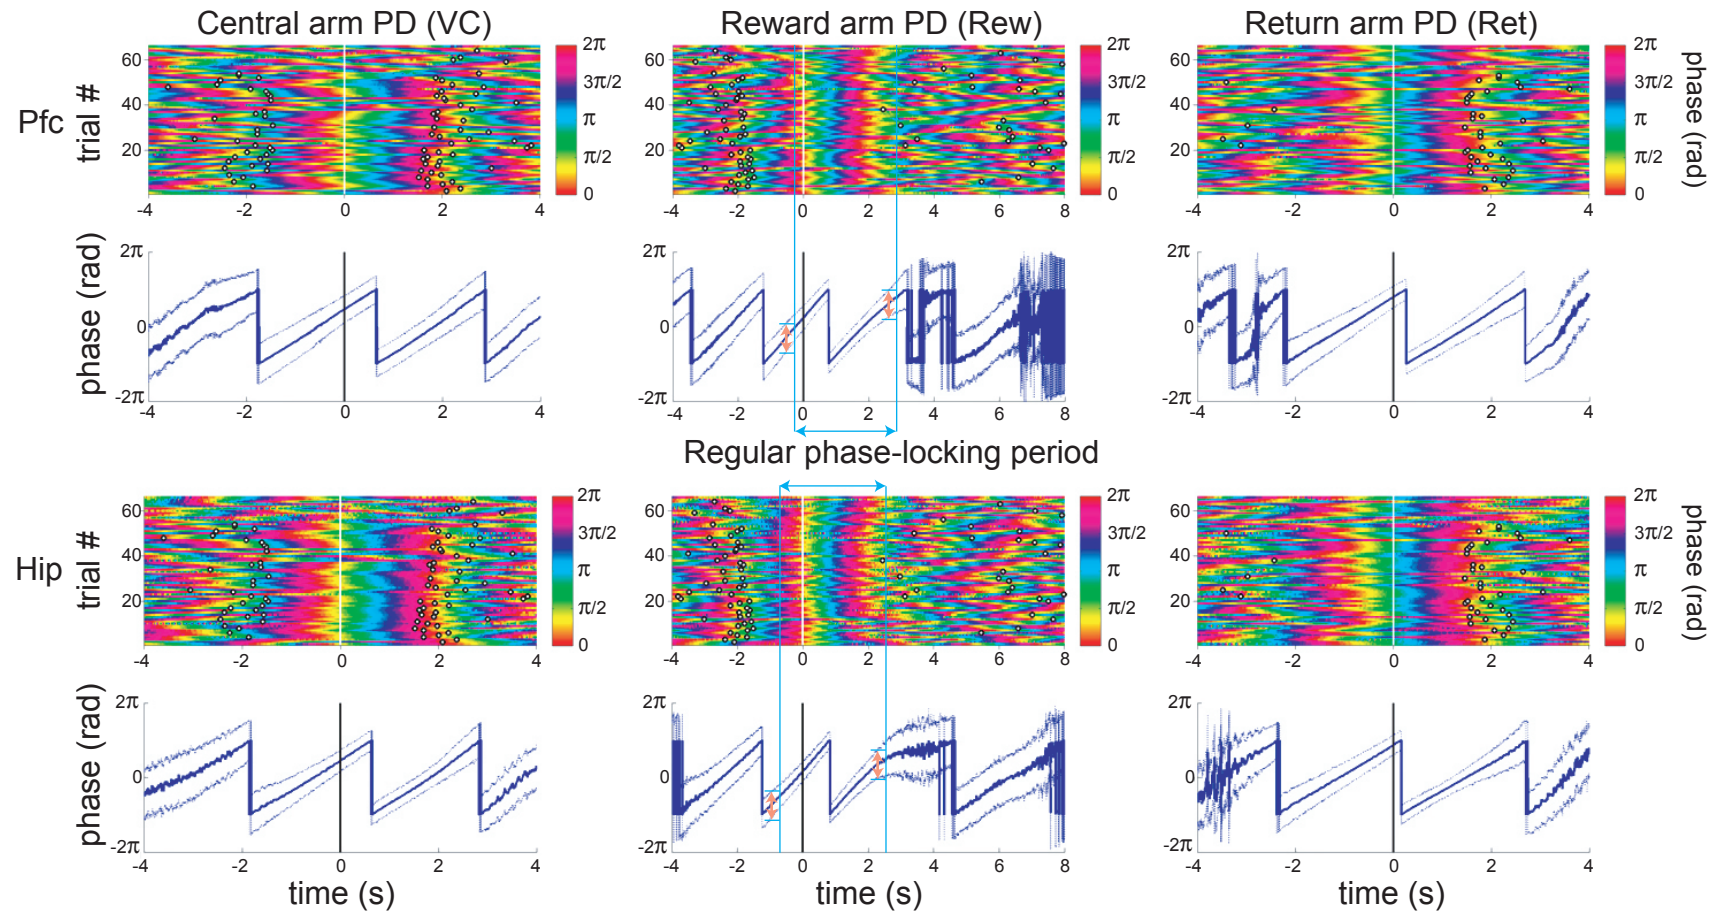

Figure 4. An example of simultaneous recordings of Pfc and Hip LFP infra-slow oscillations phase-locked to principal maze events, the PD crossings (at time zero). Each row of the color plots corresponds to a single trial. The phase of the infra-slow LFP is color-coded. Black rings correspond to the PD crossing prior to (left) or after (right) the event at zero for each plot. Note that the time scales vary among the events, in order to display prior and subsequent PD's. The traces in the 2nd and 4th rows show mean phase and dashed lines are  $\pm$ SEM. In the middle column, the blue vertical bars and blue double-headed arrow illustrate the calculation of the range of regular phase-locking (defined here as the period with the criterion of SEM range  $< 0.75 \cdot \pi$  radians; pink double-headed arrows). Here, desynchronization (zones with wider SEM ranges) and discontinuities in the mean phase result from inter-trial variability in speed and distance from the synchronization point. (PD - photodetector crossing). This is from the same session as the recording in Fig. 3B.

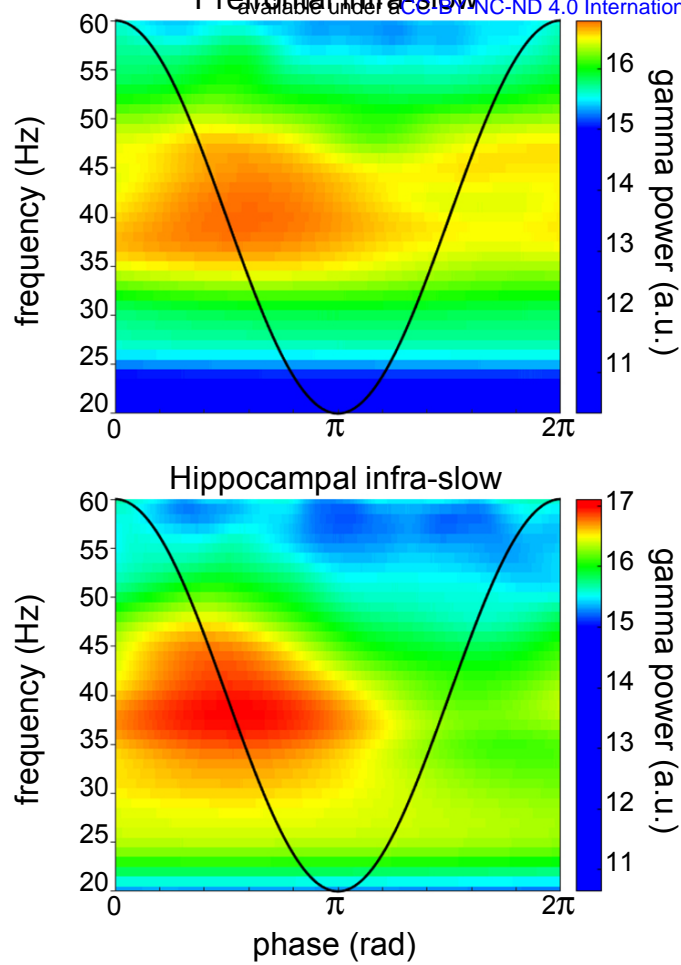

Figure 5. Example of infra-slow modulation of gamma rhythm LFP in Pfc (top) and Hip (bottom).
